# Supplementary material for: TNF-α-Producing Cryptococcus neoformans Exerts Protective Effects on Host Defenses in Murine Pulmonary Cryptococcosis
Source: PubMed Central journal article supplement (PMC6677034; doi:10.3389/fimmu.2019.01725), 2019-07-26
Supplement: Presentation_1.pdf [file Presentation_1.pdf]

## Supplementary Figures

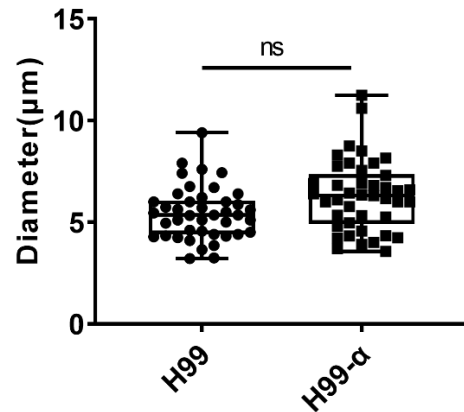

**Figure S1. Capsule diameter of H99-α is comparable with WT *C. neoformans* strain H99.**

Cryptococcal stains were cultured in YPD broth until log phase. After another 72 hours-culture in DMEM under 37 °C and 5% CO<sub>2</sub>, both strains were stained with India ink, and capsule diameters were measured under a microscope. N=50 for each group. (ns, no significant difference)

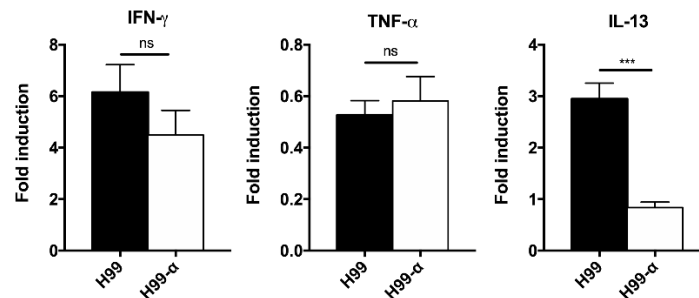

**Figure S2. Expression of the murine TNF-α diminishes Th2 cytokine expression but not Th1 cytokines of lung macrophages.** mRNA expression of TNF-α, IFN-γ & IL-13 from adherence-enriched macrophages at 14 dpi were determined by RT-qPCR. (\*\*\*,  $P < 0.001$ ; ns, no significant difference)

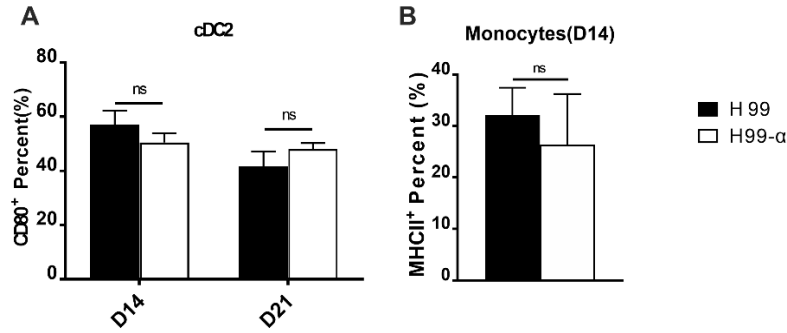

**Figure S3. H99-α infected mice showed similar cDC2 activation compared with H99 infected mice.** Isolated lung leukocytes from infected mice were analyzed by flow cytometry. The surface expression levels of CD80 or MHCII were measured. (A) Frequency of cDC2 population producing CD80 in H99-α infected mice is similar to H99 group at 14 and 21 dpi. (B) H99-α induced similar frequency of monocytes producing MHCII with H99 at 14 dpi. N=4 or more mice per group. (ns, no significant difference)

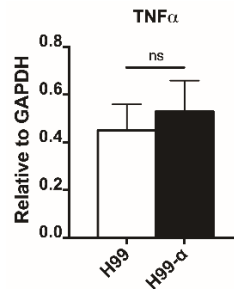

**Fig S4 BMMs incubated with H99 or H99-α in vitro for 48 hours showed similar TNF-α mRNA expression.**  $1 \times 10^5$  BMMs were infected with H99 or H99-α ( $1 \times 10^4$ ) in 96-wells cell culture plate for 48 hours. RNA from BMMs was isolated, and TNF-α mRNA expression was evaluated by RT-qPCR. (ns, no significant difference)
